# Supplementary material
Source: PubMed Central journal article supplement (PMC2964202)
Supplement: 1008235107_pnas.1008235107_SI.pdf [file 1008235107_pnas.1008235107_SI.pdf]

# Supporting Information

Tobo et al. 10.1073/pnas.1008235107

## SI Text

The equilibrium constants for reactions 1 and 2 can be expressed with a combination of the partial pressures of gaseous species, the water activity ( $a_w$ ) and the activities of aqueous solutions (see Table S1). Here we assumed the  $\text{CO}_2$  mixing ratio of 380 parts per million by volume (ppmv). In equilibrium with water vapor,  $a_w$  is equivalent to relative humidity (R.H.). The activities of aqueous solutions of  $\text{Ca}(\text{NO}_3)_2$  and  $\text{CaCl}_2$  are represented as  $4\gamma_{\pm}^3 m^3$ , where  $\gamma_{\pm}$  is their mean activity coefficient and  $m$  is their molality. The temperature and molality dependences of  $\gamma_{\pm}$  for these aqueous solutions were predicted using ion-interaction models (1–3). The water activity dependences of  $m$  for the aqueous solutions were taken from Kelly and Wexler (4). The equilibrium constant can also be expressed as a function of temperature,  $T$ , as follows (4):

$$K(T) = K(T_0) \exp \left\{ -\frac{\Delta H^0}{RT_0} \left( \frac{T_0}{T} - 1 \right) - \frac{\Delta c_p^0}{R} \left[ 1 + \ln \left( \frac{T_0}{T} \right) - \frac{T_0}{T} \right] \right\} \quad [\text{S1}]$$

where  $K(T_0)$  is the equilibrium constant at a reference temperature ( $T_0 = 298.15 \text{ K}$ ) and is given by  $\exp(-\Delta G^0/RT_0)$ .  $\Delta G^0$  and  $\Delta H^0$  are the standard Gibbs energy change of the reaction and the standard enthalpy change of the reaction at  $T_0$ , respectively, in  $\text{J mol}^{-1}$ .  $R$  and  $\Delta c_p^0$  are the gas constant and the heat capacity change at  $T_0$ , respectively, in  $\text{JK}^{-1} \text{ mol}^{-1}$ . Thus, the concentrations of  $\text{HNO}_3$  and  $\text{HCl}$  at equilibrium for reaction 1 ( $[\text{HNO}_3]_e$  and  $[\text{HCl}]_e$ , respectively) and the ratios of  $\text{HNO}_3$  to  $\text{HCl}$  at equilibrium for reaction 2 ( $[\text{HNO}_3/\text{HCl}]_e$ ) were determined as functions of temperature and R.H.. The  $[\text{HNO}_3]_e$ ,  $[\text{HCl}]_e$ , and  $[\text{HNO}_3/\text{HCl}]_e$  values at regular intervals are contained in Tables S2, S3, and S4. The thermodynamic data used in the calculations are listed in Table S5.

- Oakes CS, Felmy AR, Sterner SM (2000) Thermodynamic properties of aqueous calcium nitrate  $\{\text{Ca}(\text{NO}_3)_2\}$  to the temperatures 373 K including new enthalpy of dilution data. *J Chem Thermodynamics* 32:29–54.
- Ananthaswamy J, Atkinson G (1985) Thermodynamics of concentrated electrolyte mixtures. 5. A review of thermodynamic properties of aqueous calcium chloride in the temperature range 273.15–373.15 K. *J Chem Eng Data* 30:120–128.
- Bradley DJ, Pitzer KS (1979) Thermodynamics of electrolytes. 12. Dielectric properties of water and Debye-Hückel parameters to 350°C and 1 kbar. *J Phys Chem* 83:1599–1603.
- Kelly JT, Wexler AS (2005) Thermodynamics of carbonates and hydrates related to heterogeneous reactions involving mineral aerosol. *J Geophys Res* 110:D11201 doi:10.1029/2004JD005583.

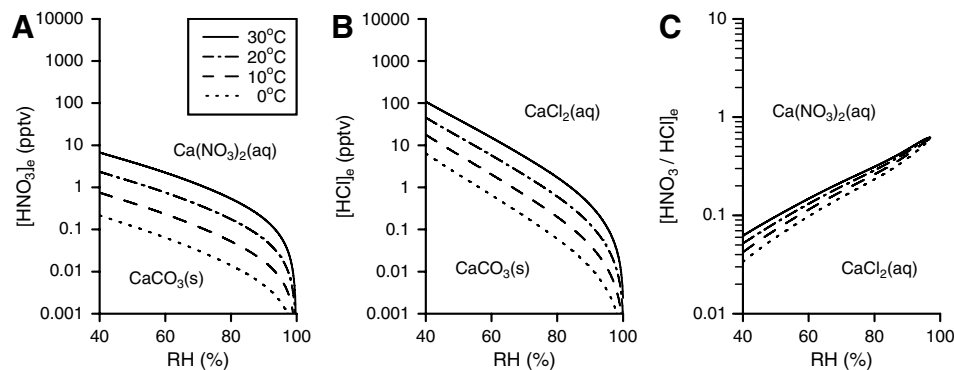

Fig. S1. Temperature and R.H. dependence of (A)  $[\text{HNO}_3]_e$ , (B)  $[\text{HCl}]_e$  for reaction 1, and (C)  $[\text{HNO}_3/\text{HCl}]_e$  for reaction 2.

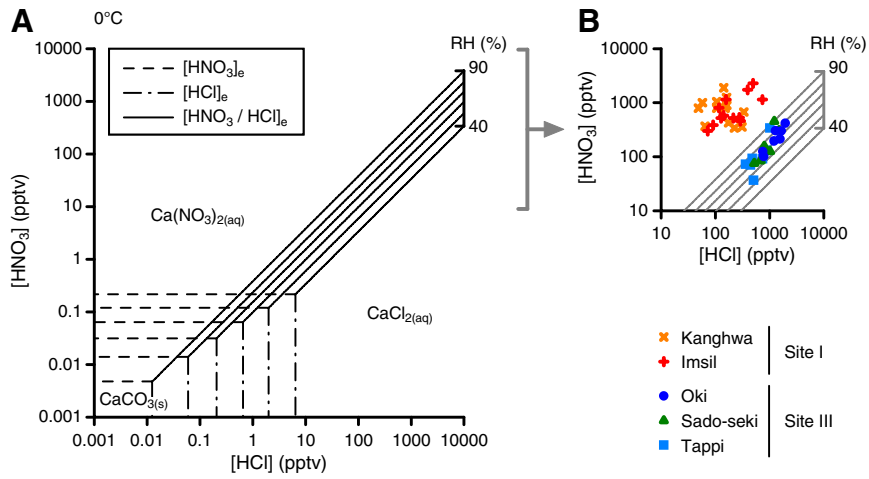

**Fig. S2.** Relationship of the concentration of  $\text{HNO}_3$  and  $\text{HCl}$  with reactions 1 and 2. (A) R.H. dependence of  $[\text{HNO}_3]_e$ ,  $[\text{HCl}]_e$ , and  $[\text{HNO}_3 / \text{HCl}]_e$  at  $0^\circ\text{C}$ . (B) Measured values of  $\text{HNO}_3$  and  $\text{HCl}$  at Kanghwa, Imsil, Oki, Sado-seki, and Tappi from March to May 2007.

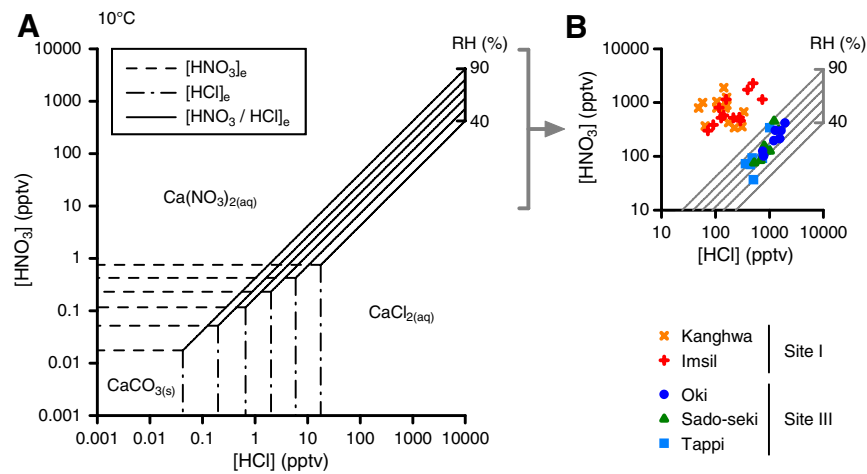

**Fig. S3.** Same as Fig. S2, but for R.H. dependence of  $[\text{HNO}_3]_e$ ,  $[\text{HCl}]_e$ , and  $[\text{HNO}_3 / \text{HCl}]_e$  at  $10^\circ\text{C}$ .

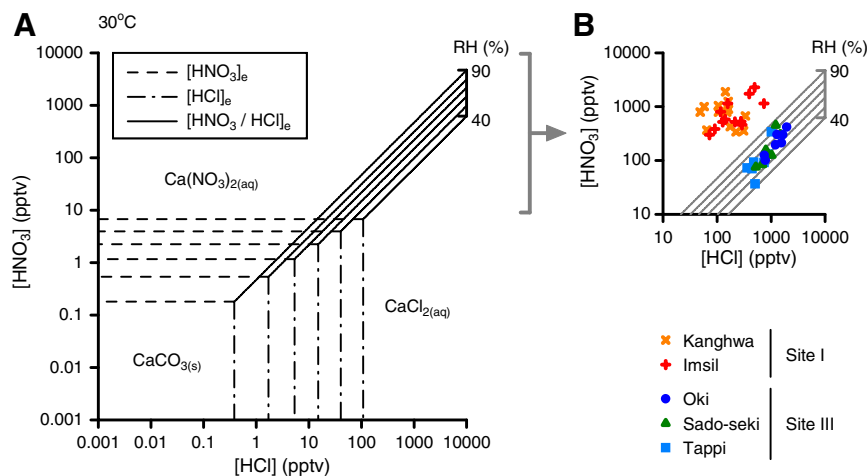

**Fig. S4.** Same as Fig. S2, but for R.H. dependence of  $[\text{HNO}_3]_e$ ,  $[\text{HCl}]_e$ , and  $[\text{HNO}_3 / \text{HCl}]_e$  at  $30^\circ\text{C}$ .

**Table S1. Equilibrium relations and constants for reactions 1 and 2**

| Reaction*                                                                                                                 | Equilibrium constant expression <sup>†</sup>                                                                             |
|---------------------------------------------------------------------------------------------------------------------------|--------------------------------------------------------------------------------------------------------------------------|
| $\text{CaCO}_{3(s)} + 2\text{HX}_{(g)} \leftrightarrow \text{CaX}_{2(aq)} + \text{H}_2\text{O}_{(aq)} + \text{CO}_{2(g)}$ | $K = \frac{4(Y_{\pm}m)_{\text{CaX}_2}^2 a_w p_{\text{CO}_2}}{p_{\text{HX}}^2}$                                           |
| $\text{Ca}(\text{NO}_3)_{2(aq)} + 2\text{HCl}_{(g)} \leftrightarrow \text{CaCl}_{2(aq)} + 2\text{HNO}_{3(g)}$             | $K = \frac{4(Y_{\pm}m)_{\text{CaCl}_2}^3 p_{\text{HNO}_3}^2}{4(Y_{\pm}m)_{\text{Ca}(\text{NO}_3)_2}^2 p_{\text{HCl}}^2}$ |

\*X is NO<sub>3</sub> or Cl.

<sup>†</sup>p<sub>CO<sub>2</sub></sub> is the partial pressure of CO<sub>2</sub> in bar, and p<sub>HX</sub> is the partial pressure of HX in bar.

**Table S2. Values of [HNO<sub>3</sub>]<sub>e</sub> at regular intervals of temperature and R.H.**

| R.H. (%) | [HNO <sub>3</sub> ] <sub>e</sub> (pptv) at T °C |        |        |        |        |
|----------|-------------------------------------------------|--------|--------|--------|--------|
|          | 0 °C                                            | 10 °C  | 20 °C  | 25 °C  | 30 °C  |
| 40       | 0.2158                                          | 0.7504 | 2.3499 | 4.0183 | 6.7302 |
| 45       | 0.1606                                          | 0.5637 | 1.7823 | 3.0625 | 5.1545 |
| 50       | 0.1197                                          | 0.4240 | 1.3533 | 2.3365 | 3.9512 |
| 55       | 0.0883                                          | 0.3159 | 1.0180 | 1.7659 | 3.0004 |
| 60       | 0.0641                                          | 0.2315 | 0.7531 | 1.3127 | 2.2408 |
| 65       | 0.0455                                          | 0.1661 | 0.5455 | 0.9553 | 1.6383 |
| 70       | 0.0316                                          | 0.1164 | 0.3857 | 0.6783 | 1.1685 |
| 75       | 0.0214                                          | 0.0793 | 0.2648 | 0.4677 | 0.8088 |
| 80       | 0.0140                                          | 0.0520 | 0.1748 | 0.3095 | 0.5370 |
| 85       | 0.0086                                          | 0.0321 | 0.1080 | 0.1916 | 0.3329 |
| 90       | 0.0048                                          | 0.0175 | 0.0587 | 0.1039 | 0.1804 |
| 95       | 0.0019                                          | 0.0070 | 0.0228 | 0.0401 | 0.0692 |

**Table S3. Values of [HCl]<sub>e</sub> at regular intervals of temperature and R.H.**

| R.H. (%) | [HCl] <sub>e</sub> (pptv) at T °C |         |         |         |         |
|----------|-----------------------------------|---------|---------|---------|---------|
|          | 0 °C                              | 10 °C   | 20 °C   | 25 °C   | 30 °C   |
| 40       | 6.4127                            | 17.7697 | 45.3885 | 70.6275 | 108.144 |
| 45       | 3.5300                            | 10.1393 | 26.7781 | 42.3300 | 65.8037 |
| 50       | 2.0029                            | 5.9136  | 16.0489 | 25.7089 | 40.4880 |
| 55       | 1.1457                            | 3.4640  | 9.6288  | 15.6082 | 24.8695 |
| 60       | 0.6530                            | 2.0176  | 5.7324  | 9.3937  | 15.1295 |
| 65       | 0.3690                            | 1.1635  | 3.3735  | 5.5840  | 9.0838  |
| 70       | 0.2062                            | 0.6625  | 1.9570  | 3.2696  | 5.3683  |
| 75       | 0.1132                            | 0.3698  | 1.1112  | 1.8723  | 3.1005  |
| 80       | 0.0599                            | 0.1987  | 0.6063  | 1.0295  | 1.7184  |
| 85       | 0.0295                            | 0.0989  | 0.3058  | 0.5231  | 0.8795  |
| 90       | 0.0125                            | 0.0423  | 0.1320  | 0.2272  | 0.3847  |
| 95       | 0.0038                            | 0.0127  | 0.0399  | 0.0691  | 0.1178  |

**Table S4. Values of [HNO<sub>3</sub>/HCl]<sub>e</sub> at regular intervals of temperature and R.H.**

| R.H. (%) | [HNO <sub>3</sub> /HCl] <sub>e</sub> at T °C |        |        |        |        |
|----------|----------------------------------------------|--------|--------|--------|--------|
|          | 0 °C                                         | 10 °C  | 20 °C  | 25 °C  | 30 °C  |
| 40       | 0.0337                                       | 0.0422 | 0.0518 | 0.0569 | 0.0622 |
| 45       | 0.0455                                       | 0.0556 | 0.0666 | 0.0723 | 0.0783 |
| 50       | 0.0597                                       | 0.0717 | 0.0843 | 0.0909 | 0.0976 |
| 55       | 0.0771                                       | 0.0912 | 0.1057 | 0.1131 | 0.1206 |
| 60       | 0.0981                                       | 0.1147 | 0.1314 | 0.1397 | 0.1481 |
| 65       | 0.1234                                       | 0.1427 | 0.1617 | 0.1711 | 0.1804 |
| 70       | 0.1533                                       | 0.1756 | 0.1971 | 0.2075 | 0.2177 |
| 75       | 0.1890                                       | 0.2144 | 0.2383 | 0.2498 | 0.2609 |
| 80       | 0.2331                                       | 0.2618 | 0.2883 | 0.3007 | 0.3125 |
| 85       | 0.2922                                       | 0.3244 | 0.3531 | 0.3662 | 0.3785 |
| 90       | 0.3800                                       | 0.4149 | 0.4444 | 0.4573 | 0.4689 |
| 95       | 0.5190                                       | 0.5495 | 0.5719 | 0.5805 | 0.5875 |

**Table S5. Summary of thermodynamic properties at 298.15 K (25 °C)\***

| Species                               | $\Delta G_f^0$ (kJ mol <sup>-1</sup> ) | $\Delta H_f^0$ (kJ mol <sup>-1</sup> ) | $c_p^0$ (J K <sup>-1</sup> mol <sup>-1</sup> ) |
|---------------------------------------|----------------------------------------|----------------------------------------|------------------------------------------------|
| CaCO <sub>3(s)</sub>                  | -1128.79                               | -1206.92                               | 81.88                                          |
| Ca(NO <sub>3</sub> ) <sub>2(aq)</sub> | -776.09                                | -957.55                                | (-181) <sup>†</sup>                            |
| CaCl <sub>2(aq)</sub>                 | -816.01                                | -877.13                                | (-275.7) <sup>‡</sup>                          |
| HNO <sub>3(g)</sub>                   | -74.72                                 | -135.06                                | 53.35                                          |
| HCl(g)                                | -95.299                                | -92.307                                | 29.12                                          |
| CO <sub>2(g)</sub>                    | -394.359                               | -393.509                               | 37.11                                          |
| H <sub>2</sub> O(aq)                  | -237.129                               | -285.83                                | 75.291                                         |

\* $\Delta G_f^0$ ,  $\Delta H_f^0$ , and  $c_p^0$  are the Gibbs energy of formation, enthalpy of formation, and heat capacity at 298.15 K, respectively. All values are from ref. 1 unless otherwise indicated.

<sup>†</sup>Apparent heat capacity at infinite dilution from ref. 2.

<sup>‡</sup>Apparent heat capacity at infinite dilution from ref. 3.

1 Wagman DD, et al. (1982) The NBS tables of chemical thermodynamic properties—Selected values for inorganic and C<sub>1</sub> and C<sub>2</sub> organic substances in SI unites. *J Phys Chem Ref Data* 11:1–392.

2 Oakes CS, Felmy AR, Sterner SM (2000) Thermodynamic properties of aqueous calcium nitrate {Ca(NO<sub>3</sub>)<sub>2</sub>} to the temperatures 373 K including new enthalpy of dilution data. *J Chem Thermodynamics* 32:29–54.

3 Ananthaswamy J, Atkinson G (1985) Thermodynamics of concentrated electrolyte mixtures. 5. A review of thermodynamic properties of aqueous calcium chloride in the temperature range 273.15–373.15 K. *J Chem Eng Data* 30:120–128.
